# Supplementary material for: ESIPT based dual fluorescent sensor and concentration dependent reconfigurable boolean operators
Source: Royal Society of Chemistry journal article supplement (doi:10.1039/c2ra21170j), 2012-01-01
Supplement: c2ra21170j.pdf [file c2ra21170j.pdf]

## ESIPT based dual fluorescent sensor and concentration dependent reconfigurable Boolean operators

Vijay Luxami<sup>\*a</sup> and Subodh Kumar<sup>b</sup>

School of Chemistry and Biochemistry, Thapar University, Patiala

Email: vj\_luxami@yahoo.co.in

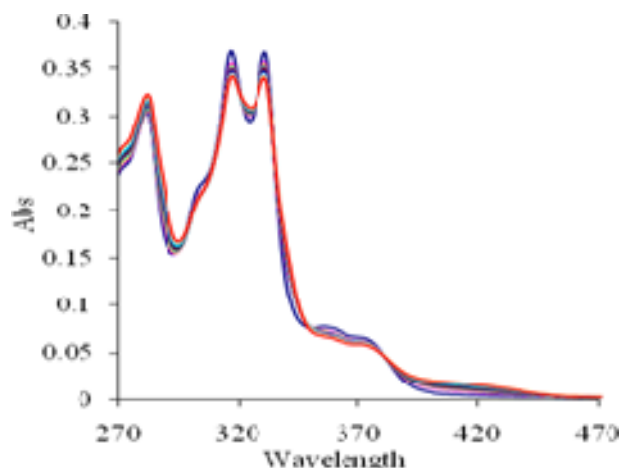

**Figure 1:** The effect of incremental addition of  $\text{Cu}^{2+}$  ions on the absorption spectra **1** ( $10 \mu\text{M}$ ) at  $\text{pH } 7.0 \pm 0.1$  (10 mM HEPES in  $\text{CH}_3\text{CN}:\text{H}_2\text{O}$  4:1, v:v).

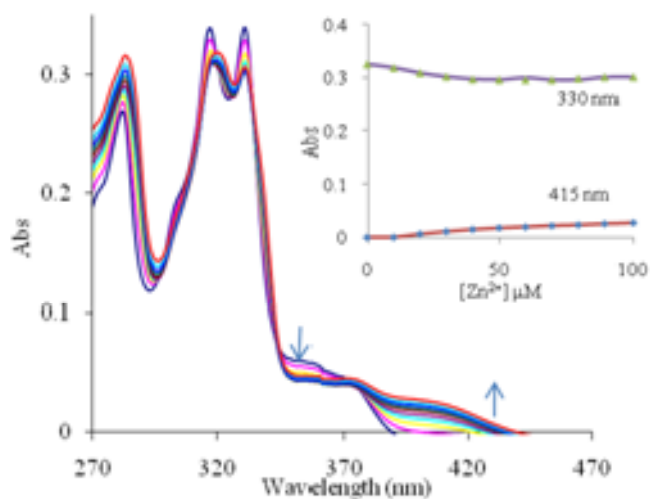

**Figure 2:** The effect of incremental addition of  $\text{Zn}^{2+}$  ions on the absorption spectrum of **1** ( $10 \mu\text{M}$ ) at  $\text{pH } 7.0 \pm 0.1$  (10 mM HEPES in  $\text{CH}_3\text{CN}:\text{H}_2\text{O}$  4:1, v:v). Inset shows spectral fitting of the absorbance data at 320 nm and 420 nm for chemosensor **1** on addition of different concentrations of  $\text{Zn}^{2+}$  ions (points are experimental values, line shows the curve fitting).

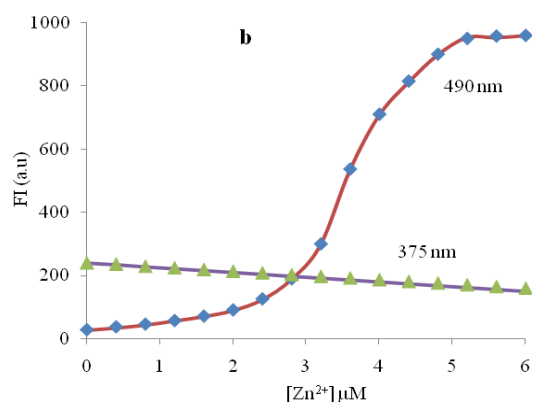

Figure 3 Spectral fitting of the fluorescence data at 375 nm and 490 nm for prober **1** on addition of different concentrations of Zn<sup>2+</sup> ions (points are experimental values, line shows the curve fitting)
